# Supplementary material for: Effects of nonoxynol-9 (N-9) on sperm functions: systematic review and meta-analysis
Source: PubMed Central journal article supplement (PMC8956826; doi:10.1530/raf-21-0024), 2022-02-21
Supplement: supplementary_figure_1.pdf [file supplementary_figure_1.pdf]

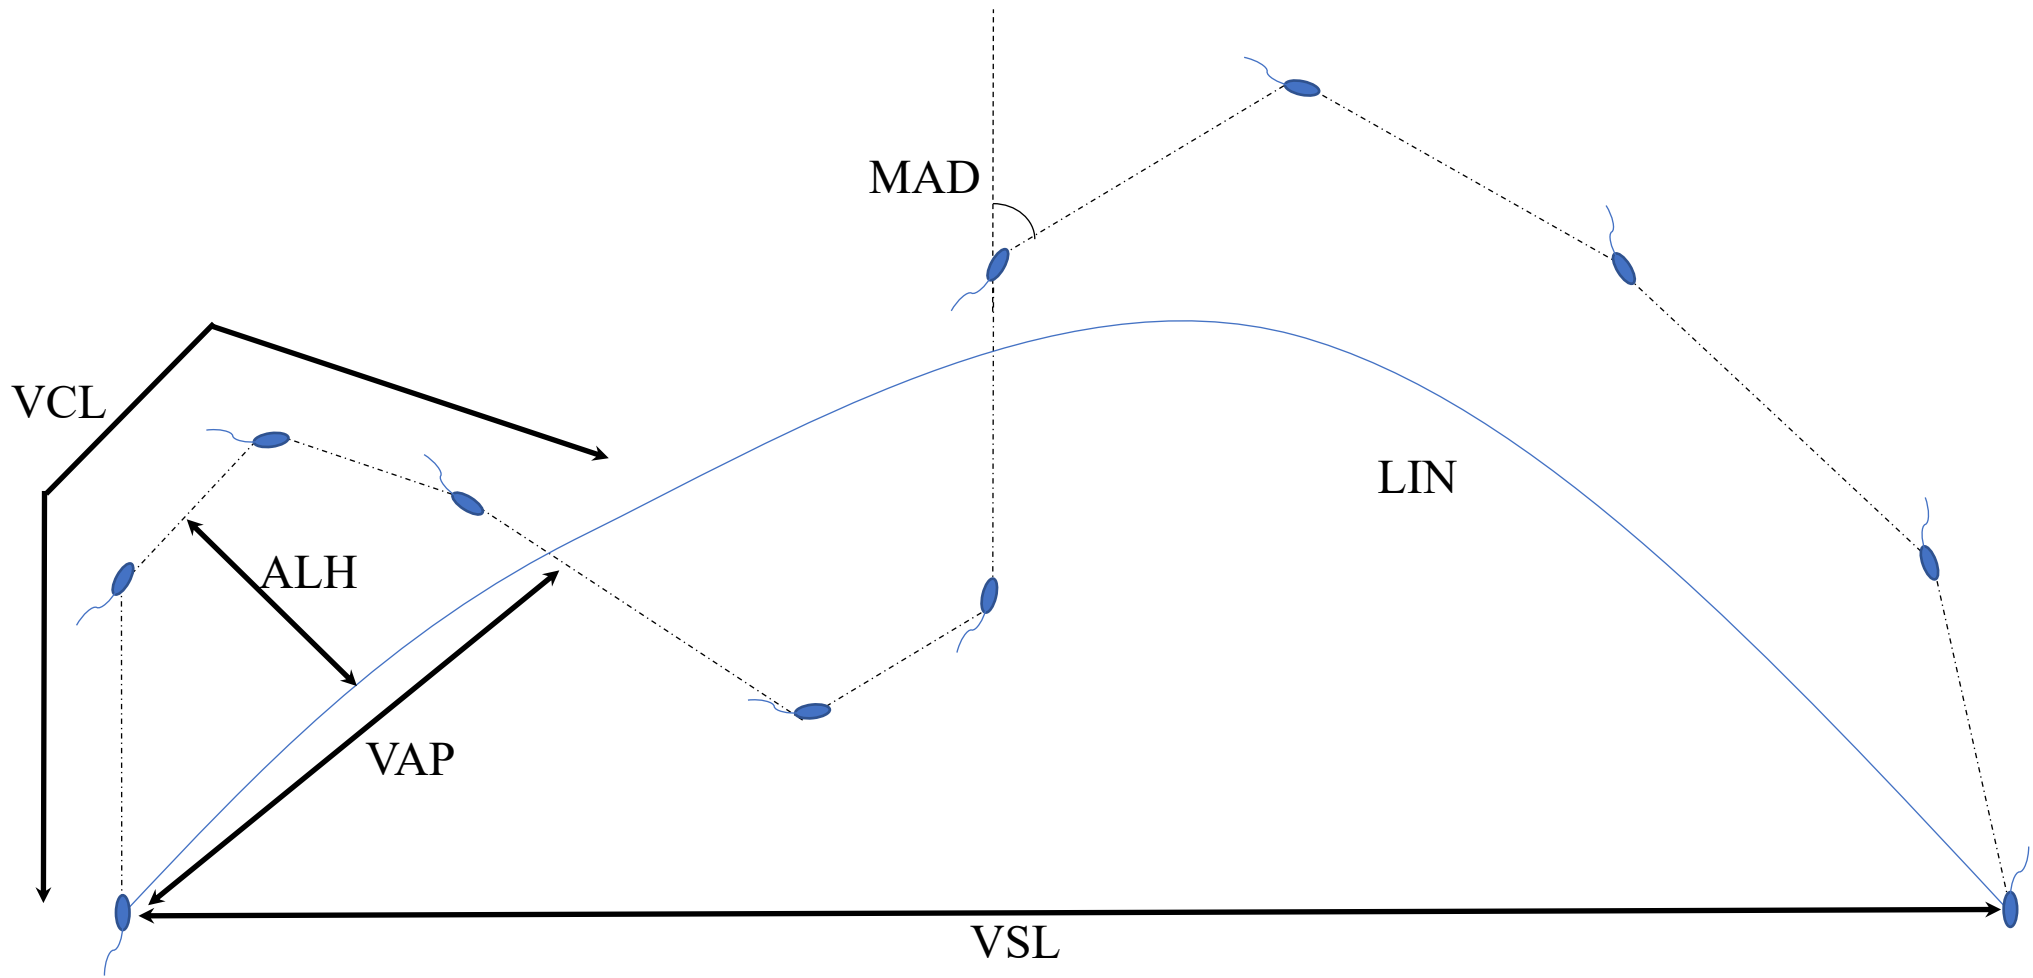

VSL: straight line velocity  
 VCL: curvilinear velocity  
 LIN: linearity of the curvilinear trajectory ( $VSL/VCL \times 100$ )  
 ALH: amplitude of lateral head displacement  
 MAD: mean angular displacement
